# Supplementary material for: Origanum vulgare L. Essential Oil as a Potential Anti-Acne Topical Nanoemulsion—In Vitro and In Vivo Study
Source: PubMed Central journal article supplement (PMC6225355; doi:10.3390/molecules23092164), 2018-08-28
Supplement: molecules-23-02164-s001.pdf [file molecules-23-02164-s001.pdf]

## Supplementary Materials

**Table S1.** Zone of inhibition (mm) against *S. epidermidis* and *P. acnes*.

| Essential Oils | <i>S. epidermidis</i> |            | <i>P. acnes</i> |            |
|----------------|-----------------------|------------|-----------------|------------|
|                | 0.7% of EO            | 1.4% of EO | 0.7% of EO      | 1.4% of EO |
| Oregano        | 20.67±1.15            | 30.67±1.15 | 20.67±1.15      | 31.67±0.58 |
| Thyme          | 16.67±1.15            | 21.67±1.53 | 16.70±1.15      | 23.30±0.58 |
| Lemongrass     | 11.67±1.15            | 17.33±1.15 | 11.67±1.15      | 19.67±0.58 |
| Tea tree       | 9.33±0.58             | 13.67±0.58 | 9.33±0.58       | 17.67±0.58 |
| Mentha         | 8.00±0.50             | 8.23±0.21  | 7.80±0.53       | 9.67±0.58  |
| Lavender       | 7.67±0.58             | 11.00±0.00 | 7.67±0.58       | 11.60±0.58 |
| Chamomile      | 7.33±0.42             | 7.47±0.50  | 7.50±0.50       | 7.96±1.00  |
| Clindamycin    | 15.33±0.58            | 18.00±0.50 | 14.00±0.50      | 20.00±0.35 |
| Erythromycin   | 10.00±0.00            | 14.10±0.36 | 12.50±0.00      | 16.00±0.50 |
| DMSO           | 7.33±0.58             | 7.10±0.16  | 7.00±0.00       | 7.00±0.00  |
| Thymol         | 19.33±0.58            | 28.67±1.15 | 19.33±0.58      | 24.33±0.58 |

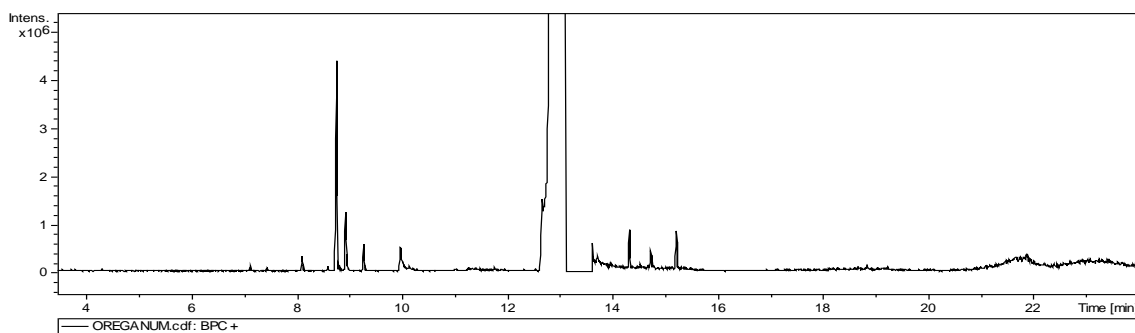

(a).

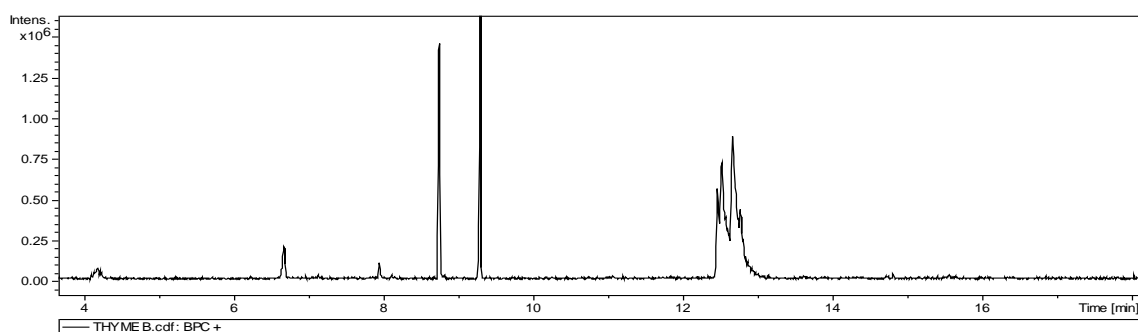

(b)

**Figure S1.** GC-MS analysis of (a) oregano oil and (b) thyme oil.

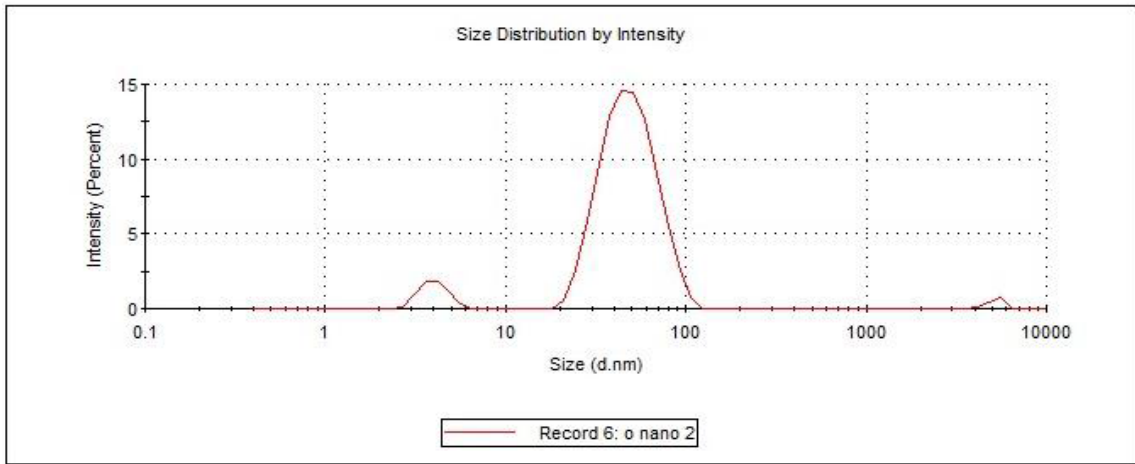

**Figure S2.** Size distribution by the intensity of the developed oregano nanoemulsion.
